# Supplementary material for: Estimated Indirect Cost Savings of Using Telehealth Among Nonelderly Patients With Cancer
Source: PubMed Central journal article supplement (PMC9856804; doi:10.1001/jamanetworkopen.2022.50211), 2023-01-10
Supplement: jamanetwopen-e2250211-s002.pdf [file jamanetwopen-e2250211-s002.pdf]

## Data Sharing Statement

Patel. Estimated Indirect Cost Savings of Using Telehealth Among Nonelderly Patients With Cancer. *JAMA Netw Open*. Published January 10, 2023.

doi:10.1001/jamanetworkopen.2022.50211

### Data

**Data available:** Yes

**Data types:** Deidentified participant data

**How to access data:** [krupal.patel@moffitt.org](mailto:krupal.patel@moffitt.org)

**When available:** With publication

### Supporting Documents

**Document types:** None

### Additional Information

**Who can access the data:** Researchers whose proposed use of the data has been approved

**Types of analyses:** For specified purpose

**Mechanisms of data availability:** after approval of proposal and with a signed data access agreement
